# Supplementary material for: A Pilot Study of Rare Renal Amyloidosis Based on FFPE Proteomics
Source: MDPI journal article supplement (doi:10.3390/molecules26237234), 2021-11-29
Supplement: s1 [file s1]

*Supplementary Materials*

**A Pilot Study of Rare Renal Amyloidosis Based on FFPE Proteomics**

**Shuang Meng <sup>1,†</sup>, Wenwen Xia <sup>2,†</sup>, Li Xia <sup>1</sup>, Li Zhou <sup>1</sup>, Jing Xu <sup>3</sup>, Xiaoxia Pan <sup>3,\*</sup> and Liyuan Meng <sup>1,\*</sup>**

- <sup>1</sup> Department of Core Facility of Basic Medical Sciences, Shanghai Jiao Tong University School of Basic Medicine, Shanghai 200025, China; mengshuang92@shsmu.edu.cn (S.M.); lixia@shsmu.edu.cn (L.X.); zhouli\_bit@shsmu.edu.cn (L.Z.)
- <sup>2</sup> Department of Pathology, Ninth People's Hospital, Shanghai Jiao Tong University School of Medicine, Shanghai 200011, China; xiawenwenliuyedao@163.com
- <sup>3</sup> Department of Nephrology, Ruijin Hospital, Shanghai Jiao Tong University School of Medicine, Shanghai 200025, China; xj11564@rjh.com.cn
- \* Correspondence: pxx10768@rjh.com.cn (X.P.); mengliyuan@shsmu.edu.cn (L.M.); Tel.: +86-21-64370045 (X.P.); +86-21-63846590 (L.M.)
- † These authors contributed equally to this work.

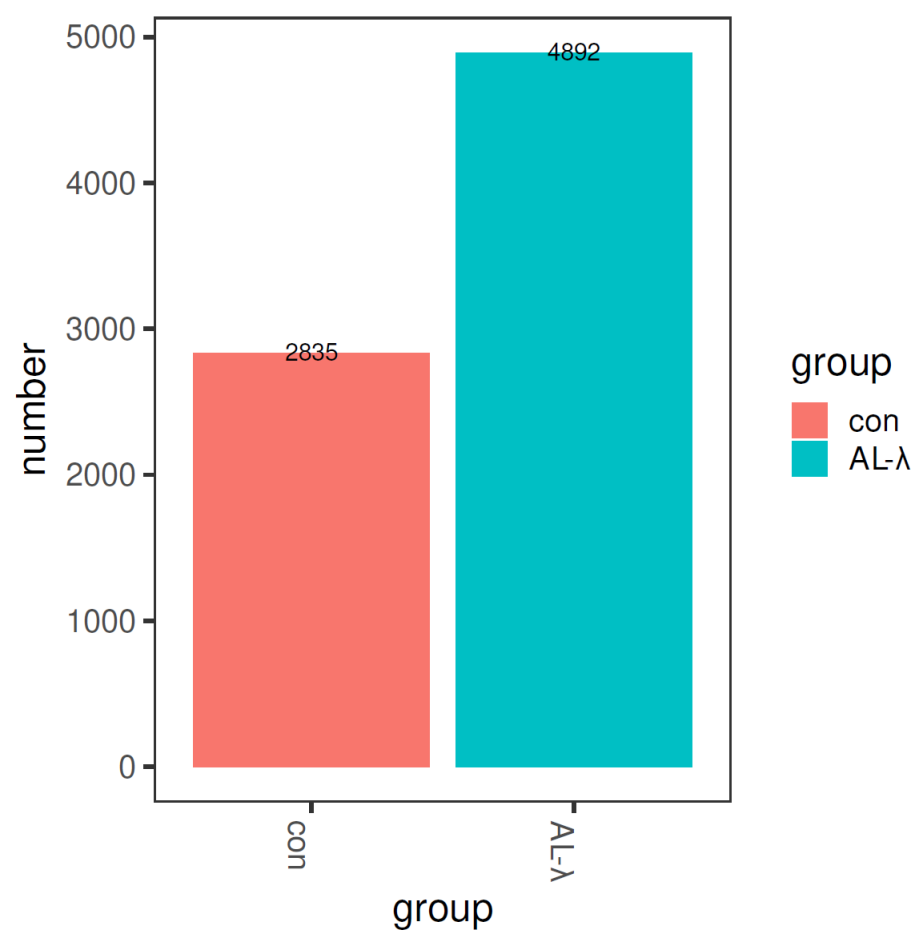

**Figure S1.** Identified protein in control and AL-λ groups.

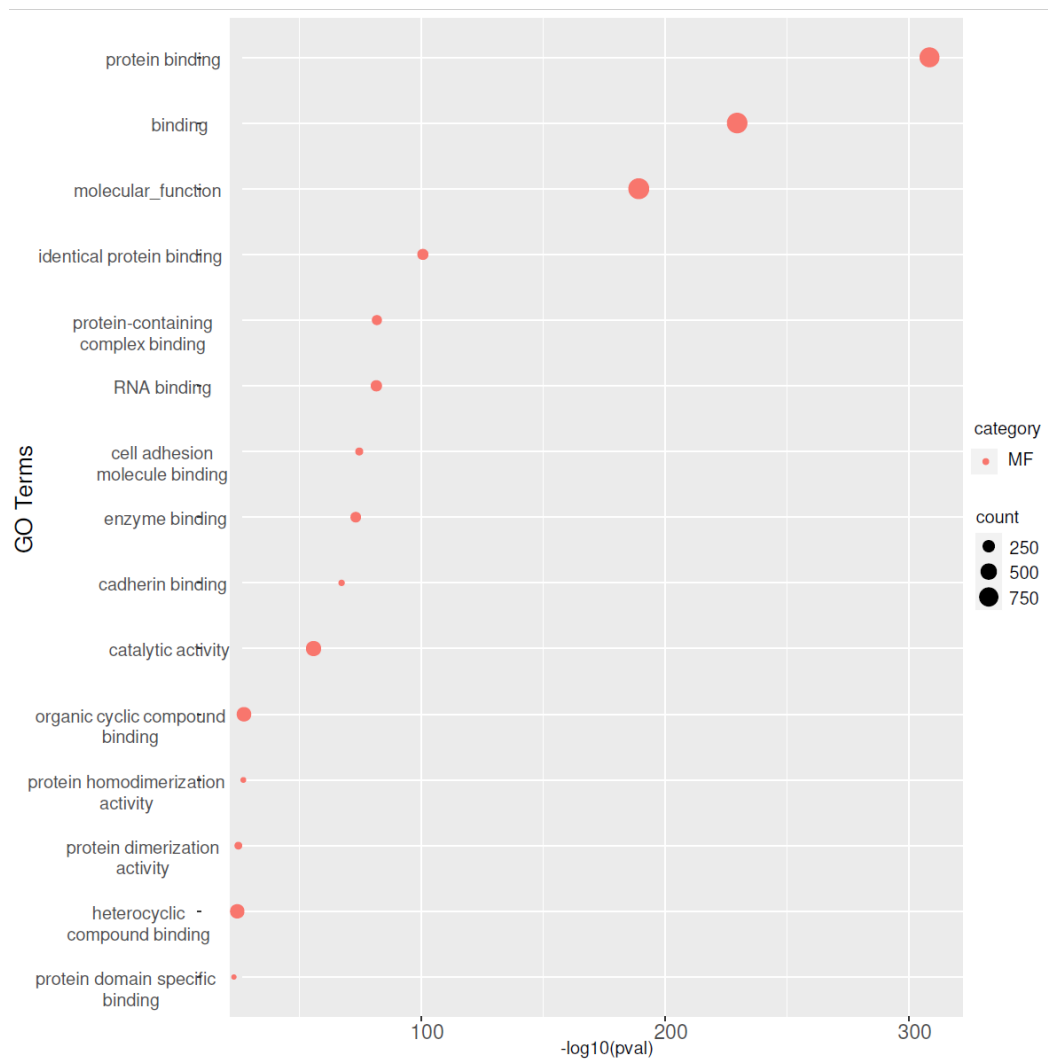

(a)

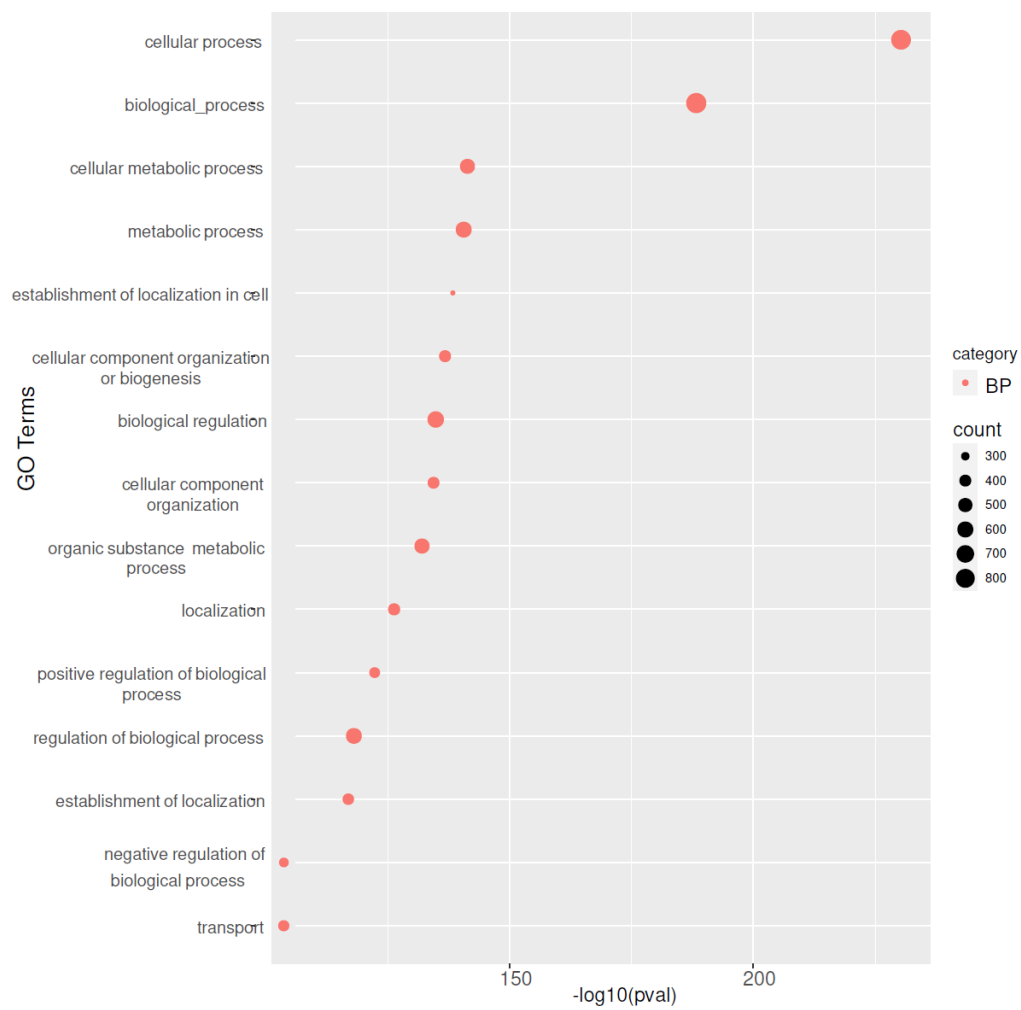

(b)

**Figure S2. (a).** Go enrichment analysis bubble plot for molecular functions. **(b).** Go enrichment analysis bubble plot for biological processes.

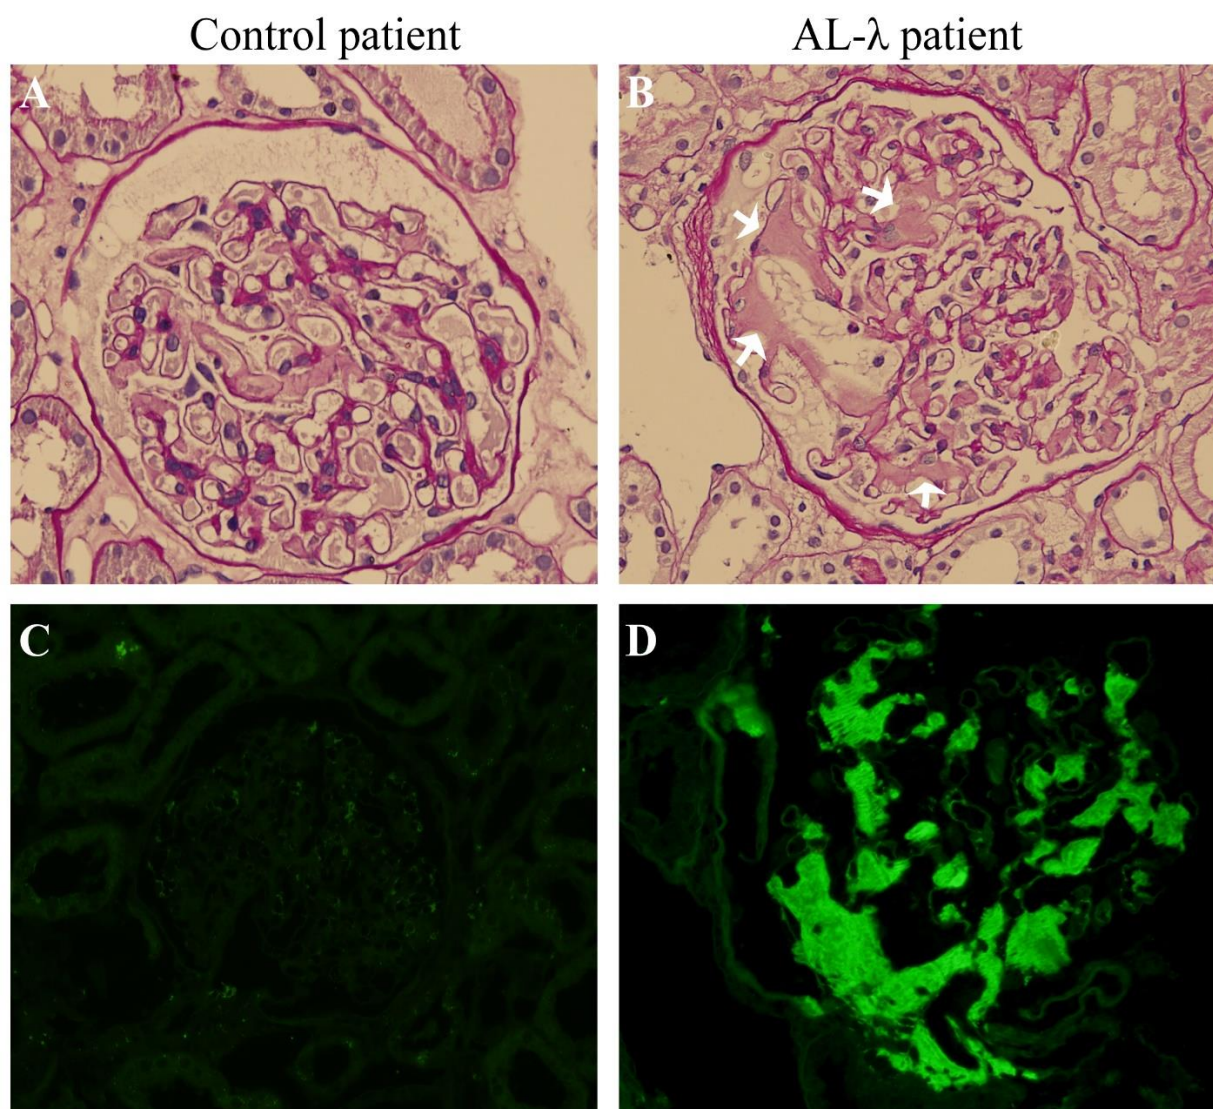

**Figure S3:** Light micrograph and Immunofluorescent staining for lambda light chain in kidney biopsy. a. light micrograph of glomerulus from a patient with minor glomerular disease showing no glomerular changes; b. mesangial and arteriolar amyloid deposition in patient with amyloidosis (white arrow); c. no lambda light chain deposition in patient with minor glomerular disease; d. positive mesangial and arteriolar lambda light chain deposition in patient with amyloidosis. (a. b. PAS 400 $\times$ ; c. d. light chain lambda 400 $\times$ )
